# Supplementary material for: Mesenchymal Stem Cell Therapy Facilitates Donor Lung Preservation by Reducing Oxidative Damage during Ischemia
Source: Hindawi journal article supplement (doi:10.1155/2019/8089215), 2019-08-05

**Mesenchymal stem cells therapy facilitates donor lung preservation by reducing oxidative-damage during ischemia.**

**Supplementary Methods: surgical procedure.**

**1.** Intrahepatic administration of Heparin (1000 U/kg). After 5 min, euthanasia was carried out using sodium thiopental (250 mg/kg) administered by the same route.

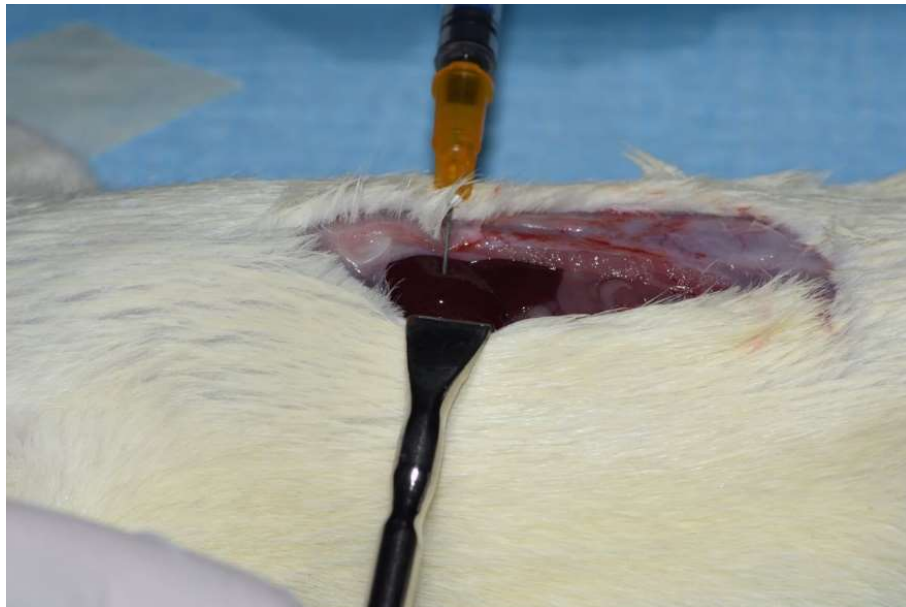

## 2. Intubation by tracheotomy.

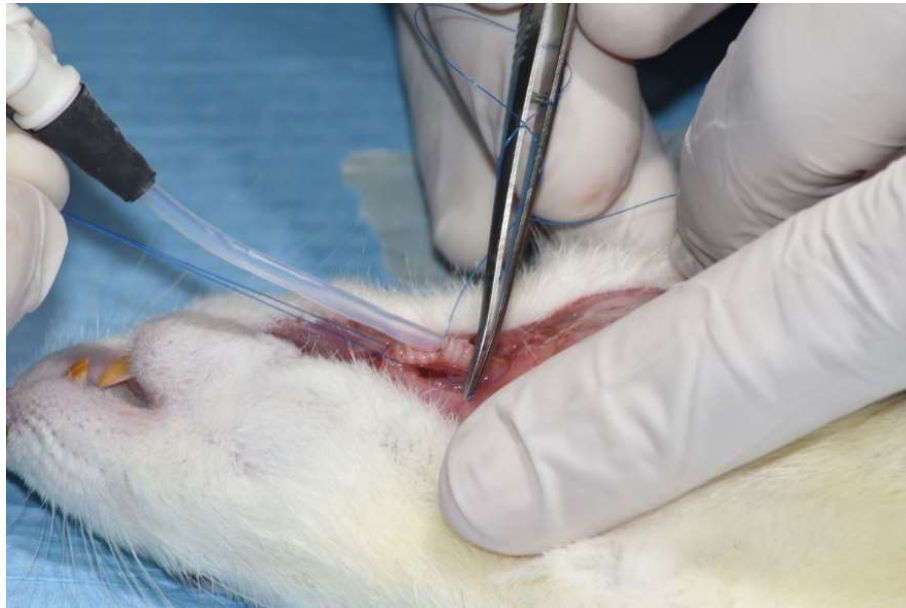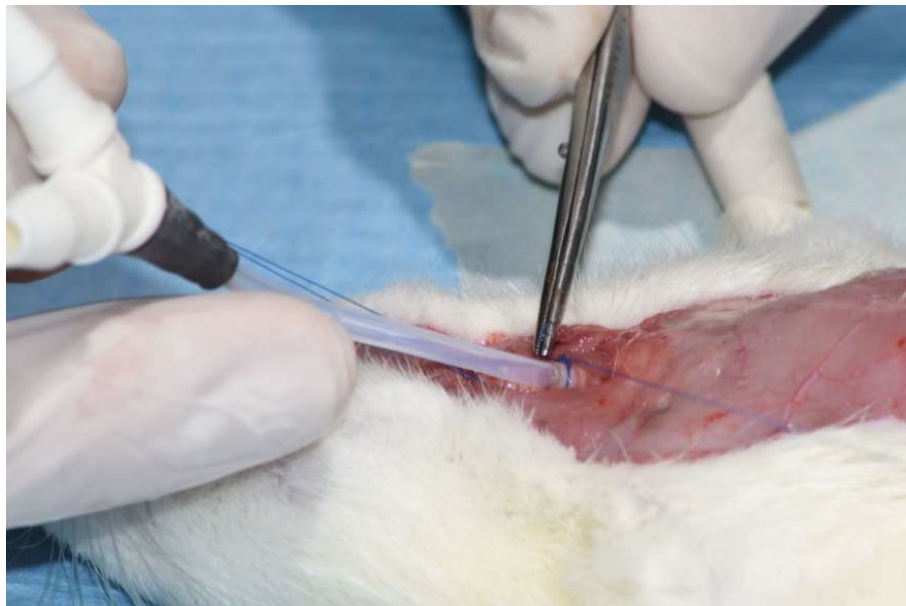

### 3. Mechanical ventilation and median sternotomy.

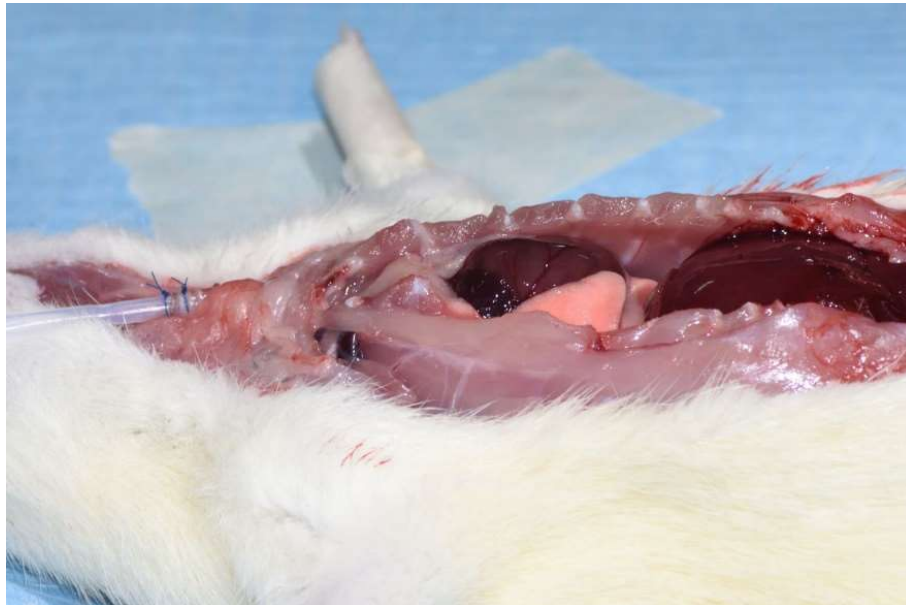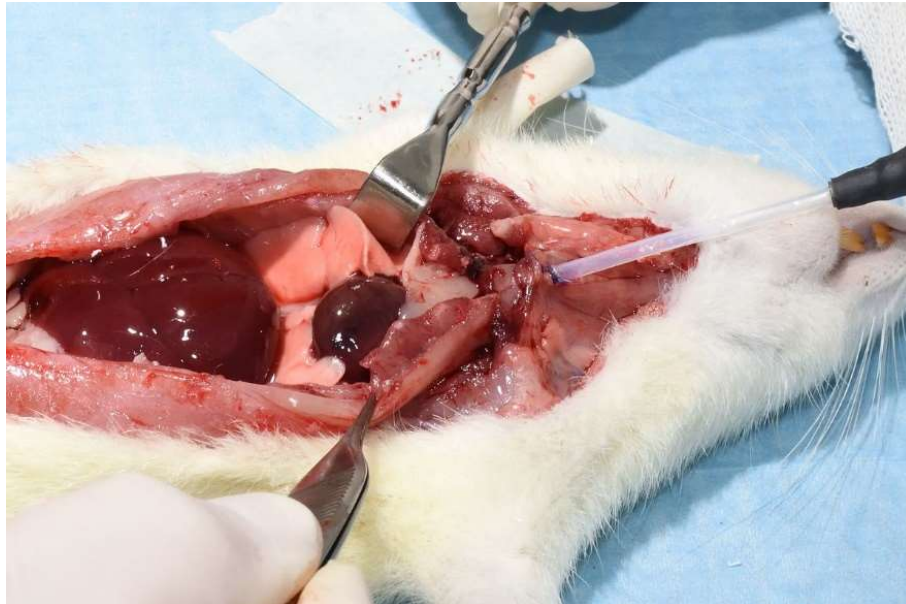

4. Placement of the cannula in the pulmonary artery through the right ventricle.

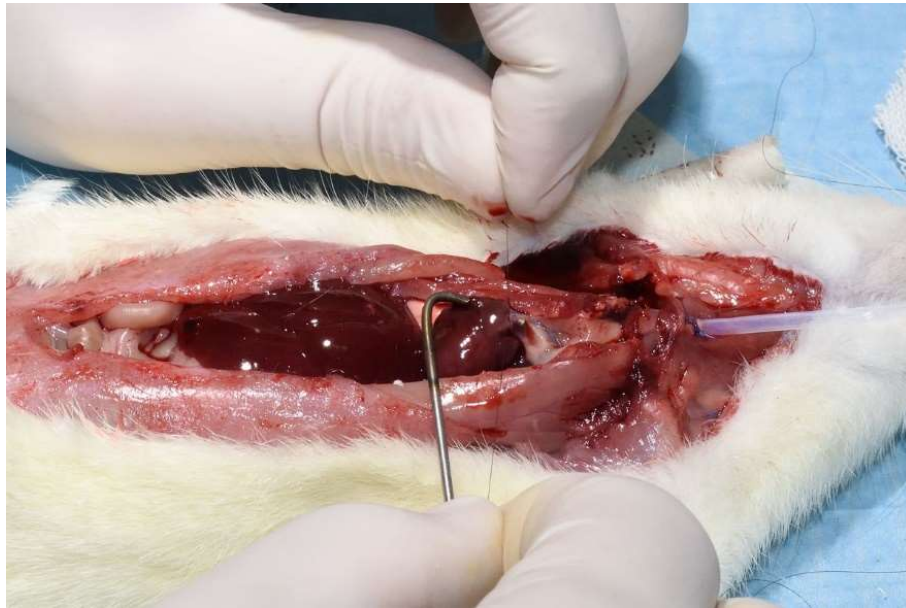

5. Ablation of the lungs.

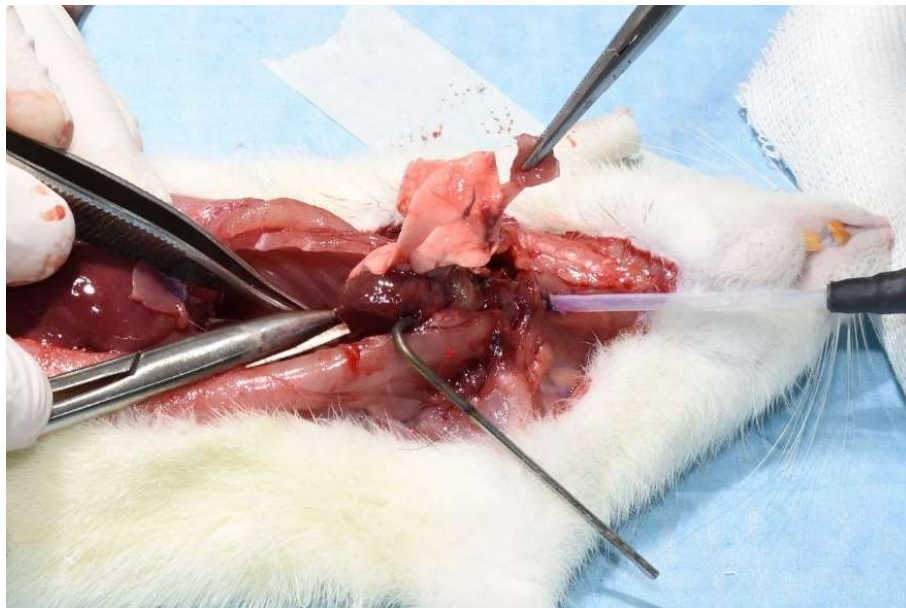



**6.** Washing with physiological solution. Note the placement of the cannula in the pulmonary artery.

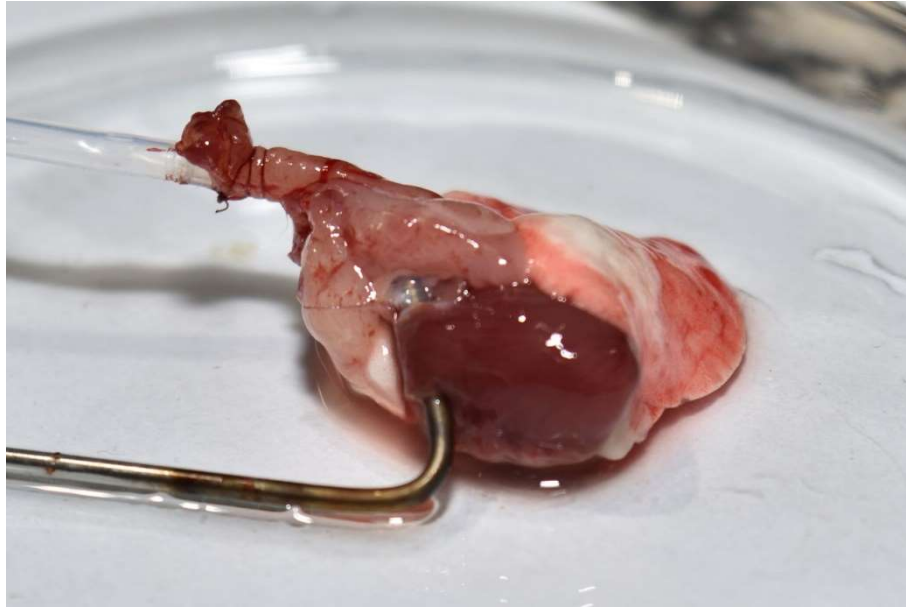

**7.** Positioning of the lungs for the administration of cells and reperfusion.

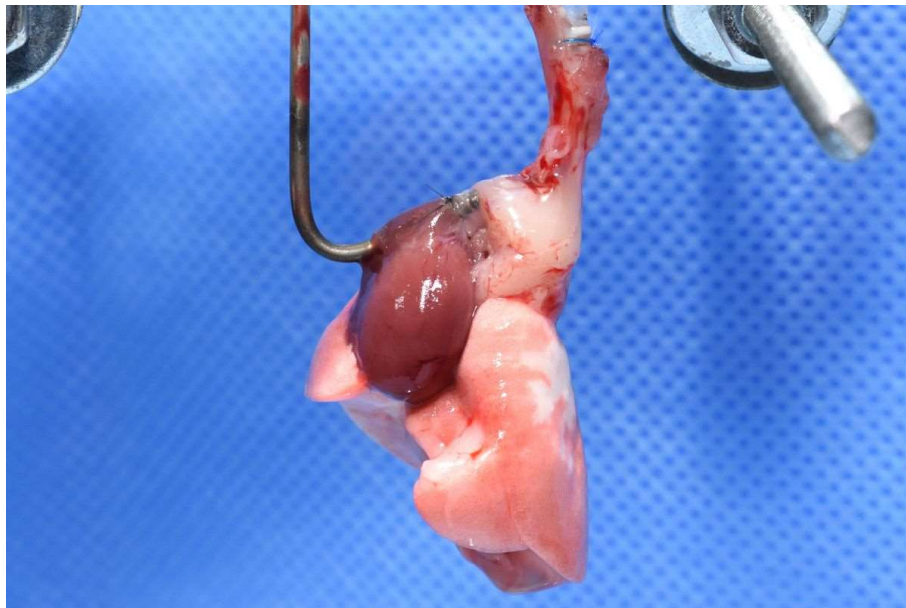

Supplement: f1 [file 8089215.f1.zip]
