# Supplementary material for: Mesenchymal Stem Cell Therapy Facilitates Donor Lung Preservation by Reducing Oxidative Damage during Ischemia
Source: Hindawi journal article supplement (doi:10.1155/2019/8089215), 2019-08-05
Supplement: f1 [file 8089215.f1.zip]

**a**

RR 66 bpm  
Tidal Vol 1.15 ml  
% Anest -- %

Peak Press 20.3 cmH<sub>2</sub>O  
Meas Min Vol 76 ml/min  
Vol Anest 1.06 ml

Pressure (cm H<sub>2</sub>O) vs Time (s) waveform. The waveform shows periodic pressure oscillations between approximately 2 and 20 cm H<sub>2</sub>O. The monitor displays "Pressure" and "RUNNING".

**b**

Vt = 1.15 ml (4.3 ml/kg)

Pressure (cm H<sub>2</sub>O) vs Time (s) graph. The graph shows periodic pressure oscillations. The peak pressure is labeled P<sub>peak</sub> and the end-expiratory pressure is labeled PEEP. The pressure ranges from approximately 2 to 20 cm H<sub>2</sub>O. The time axis ranges from 0 to 8 seconds.
