# Supplementary material for: Mesenchymal Stem Cell Therapy Facilitates Donor Lung Preservation by Reducing Oxidative Damage during Ischemia
Source: Hindawi journal article supplement (doi:10.1155/2019/8089215), 2019-08-05
Supplement: f1 [file 8089215.f1.zip]

**Figure S2.**

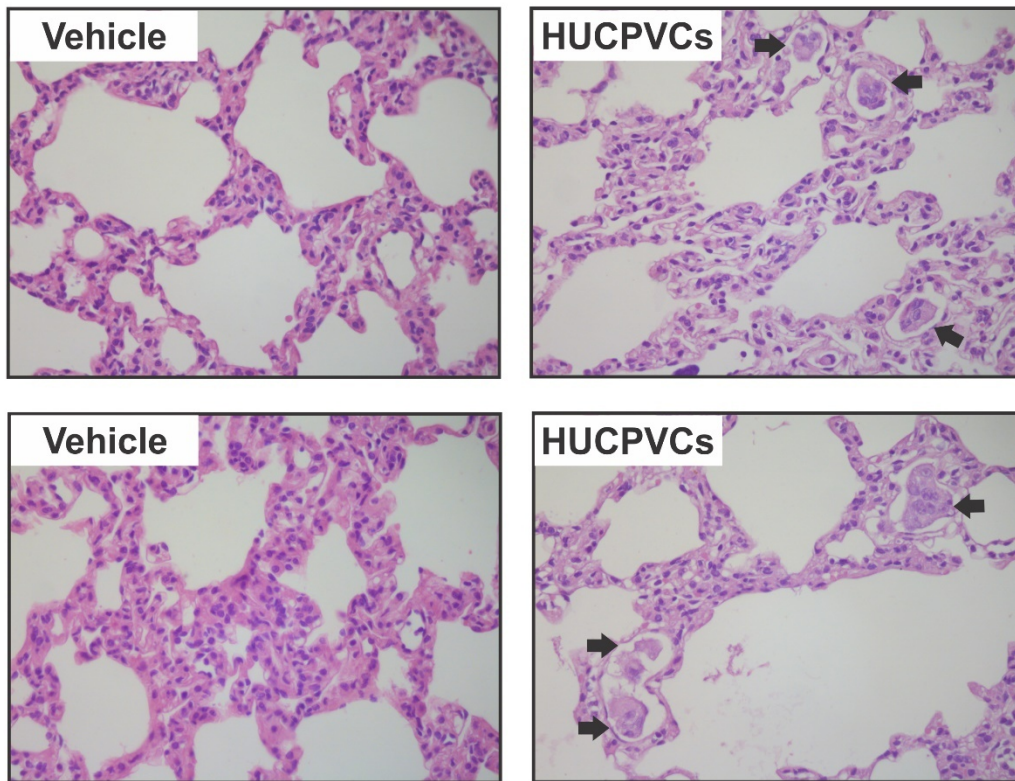

**Figure S2.** Hematoxylin and eosin stained sections obtained at the end of the perfusion from lungs receiving infusion of vehicle (left panels) or HUCPVCs (right panels). Representative images from each group at  $\times 400$  original magnification. Black arrows indicate the presence of large cells in the lung microvasculature.
